# Supplementary material for: Anti-Cancer Activity of Phenyl and Pyrid-2-yl 1,3-Substituted Benzo[1,2,4]triazin-7-ones and Stable Free Radical Precursors
Source: PubMed Central journal article supplement (PMC6017941; doi:10.3390/molecules23030574), 2018-03-03
Supplement: molecules-23-00574-s001.pdf [file molecules-23-00574-s001.pdf]

## SUPPLEMENTARY MATERIAL for

# Anti-cancer Activity of Phenyl and Pyrid-2-yl 1,3-Substituted Benzo[1,2,4]triazin-7-ones and Stable Free Radical Precursors

Lee-Ann J. Keane, Styliana I. Mirallai, Martin Sweeney, Michael P. Carty, Georgia A. Zissimou, Andrey A. Berezin, Panayiotis A. Koutentis, and Fawaz Aldabbagh\*

### INDEX

Figures S1-S4 <sup>1</sup>H and <sup>13</sup>C-NMR Spectra for Compounds **4a** and **4b**

Figure S5-S6 NCI-60 One-Dose Mean Graph Data for Compounds **4a** and **4b**

Figures S7-S8 NCI-60 Five-Dose Mean Graph Data for Compounds **4a** and **4b**

Figures S9-S13 Viability of DU145 and MCF-7 cell lines as determined using the MTT assay for Compounds **TEMPO**, **3a**, **3b**, **4a** and **4b**

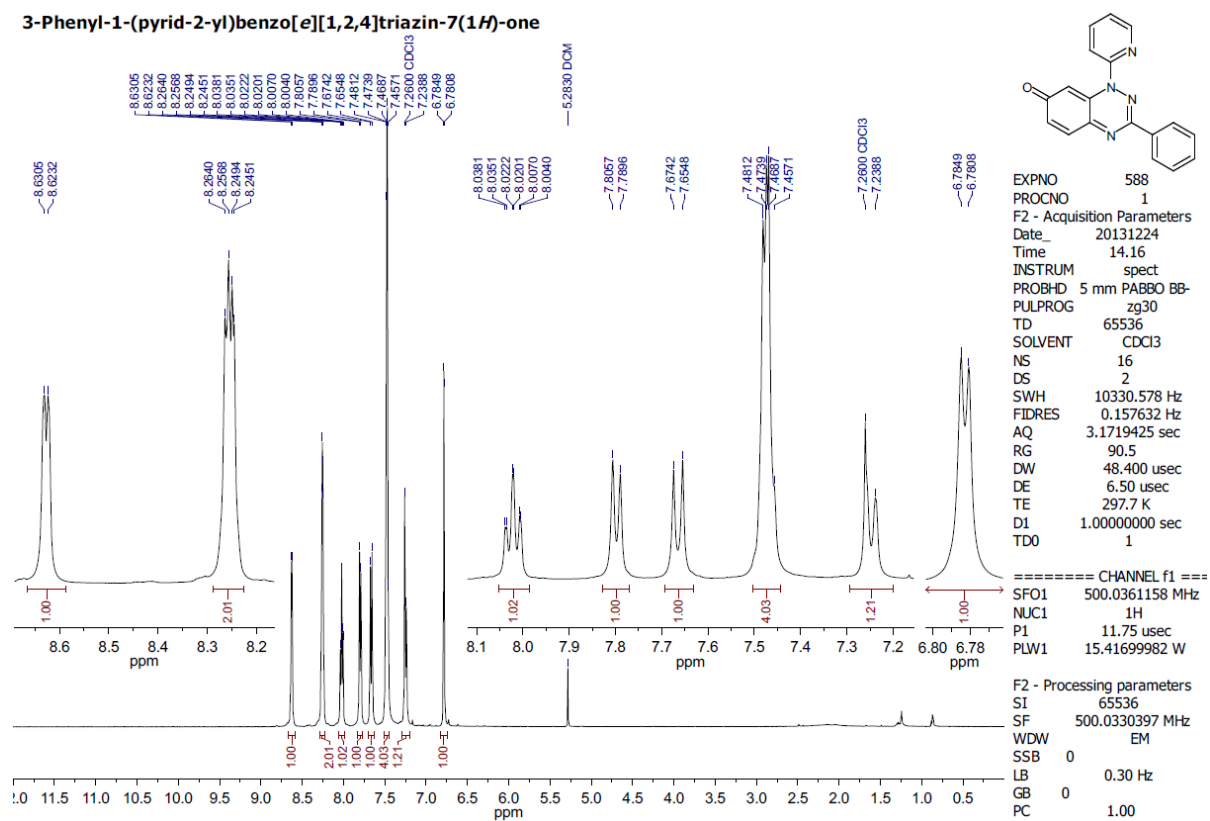

**Figure S1.**  $^1\text{H}$  NMR (500 MHz) spectrum in  $\text{CDCl}_3$  of 3-phenyl-1-(pyrid-2-yl)-benzo[e][1,2,4]triazin-7(1H)-one (**4a**).

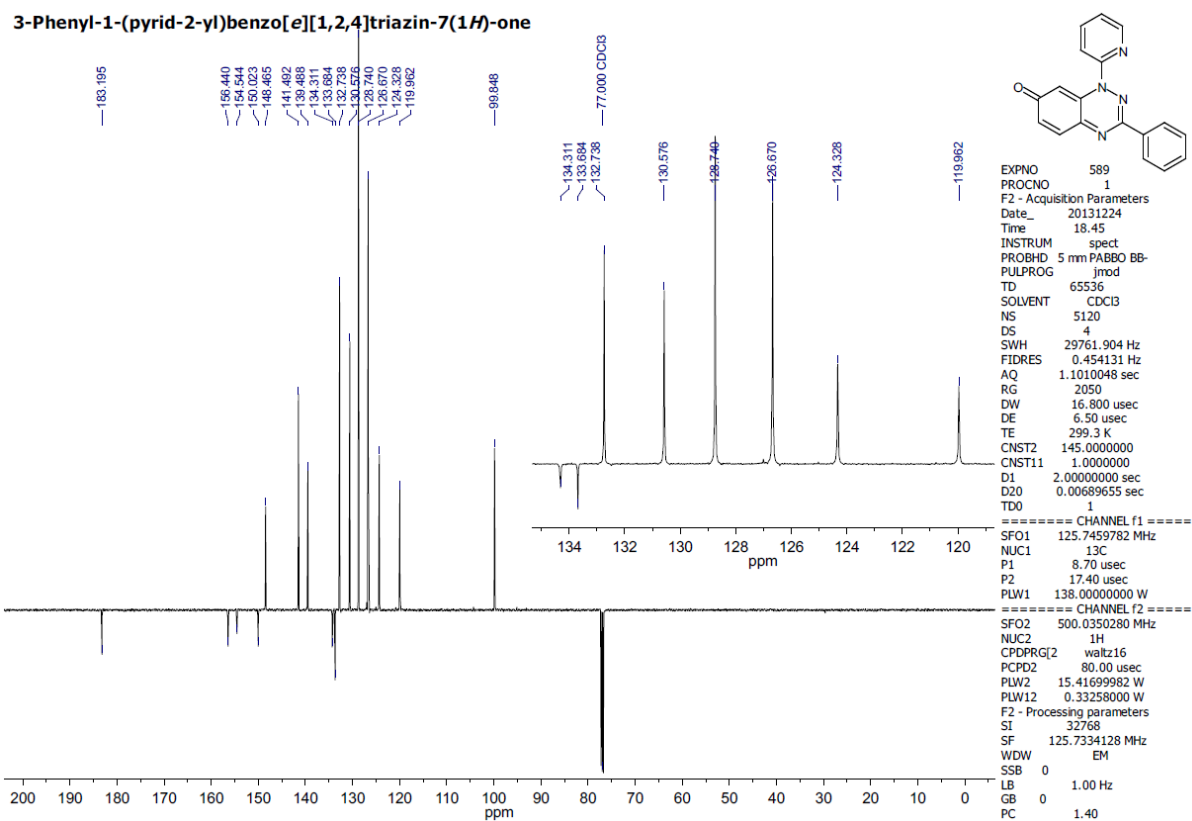

**Figure S2.** <sup>13</sup>C NMR (125 MHz) spectrum in CDCl<sub>3</sub> of 3-phenyl-1-(pyrid-2-yl)-benzo[e][1,2,4]triazin-7(1H)-one (**4a**).

**1-Phenyl-3-(pyrid-2-yl)benzo[e][1,2,4]triazin-7(1H)-one**

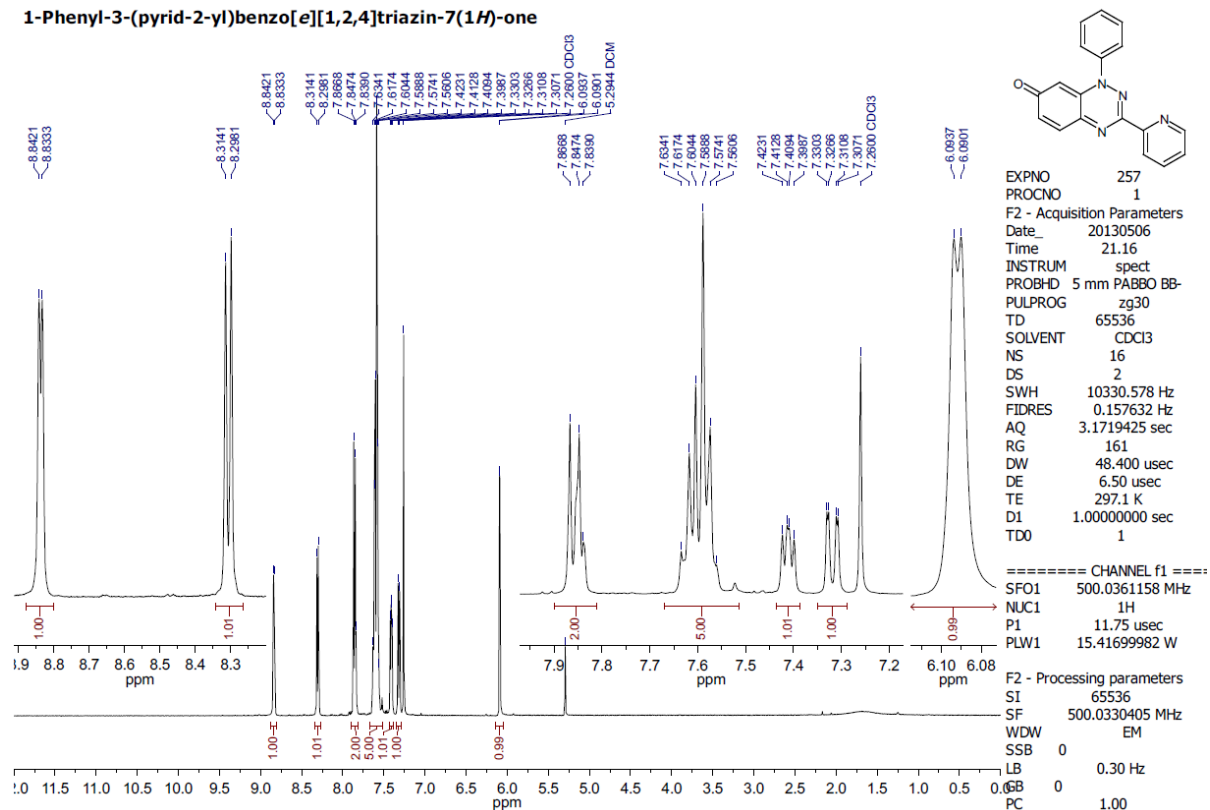

**Figure S3.**  $^1\text{H}$  NMR (500 MHz) spectrum in  $\text{CDCl}_3$  of 1-phenyl-3-(pyrid-2-yl)-benzo[e][1,2,4]triazin-7(1H)-one (**4b**).

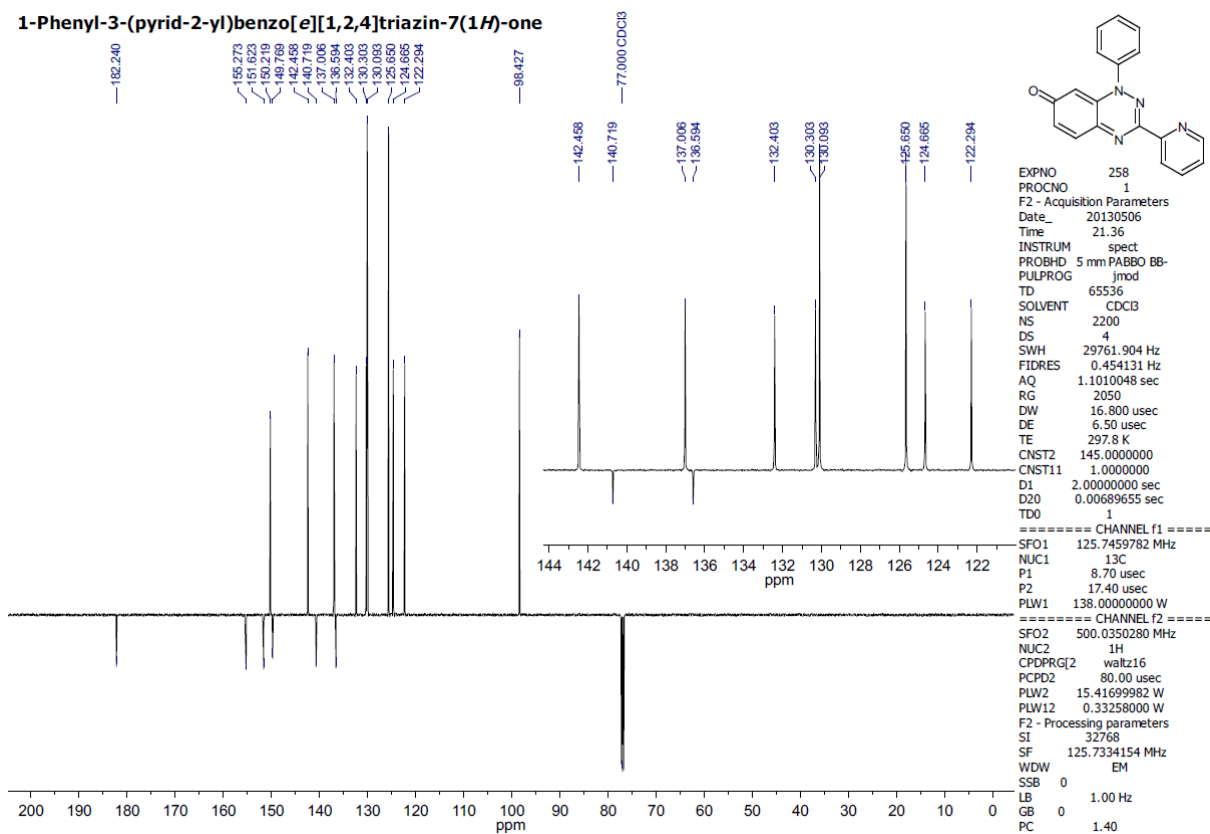

**Figure S4.** <sup>13</sup>C NMR (125 MHz) spectra in CDCl<sub>3</sub> of 1-phenyl-3-(pyrid-2-yl)-benzo[*e*][1,2,4]triazin-7(1*H*)-one (**4b**).

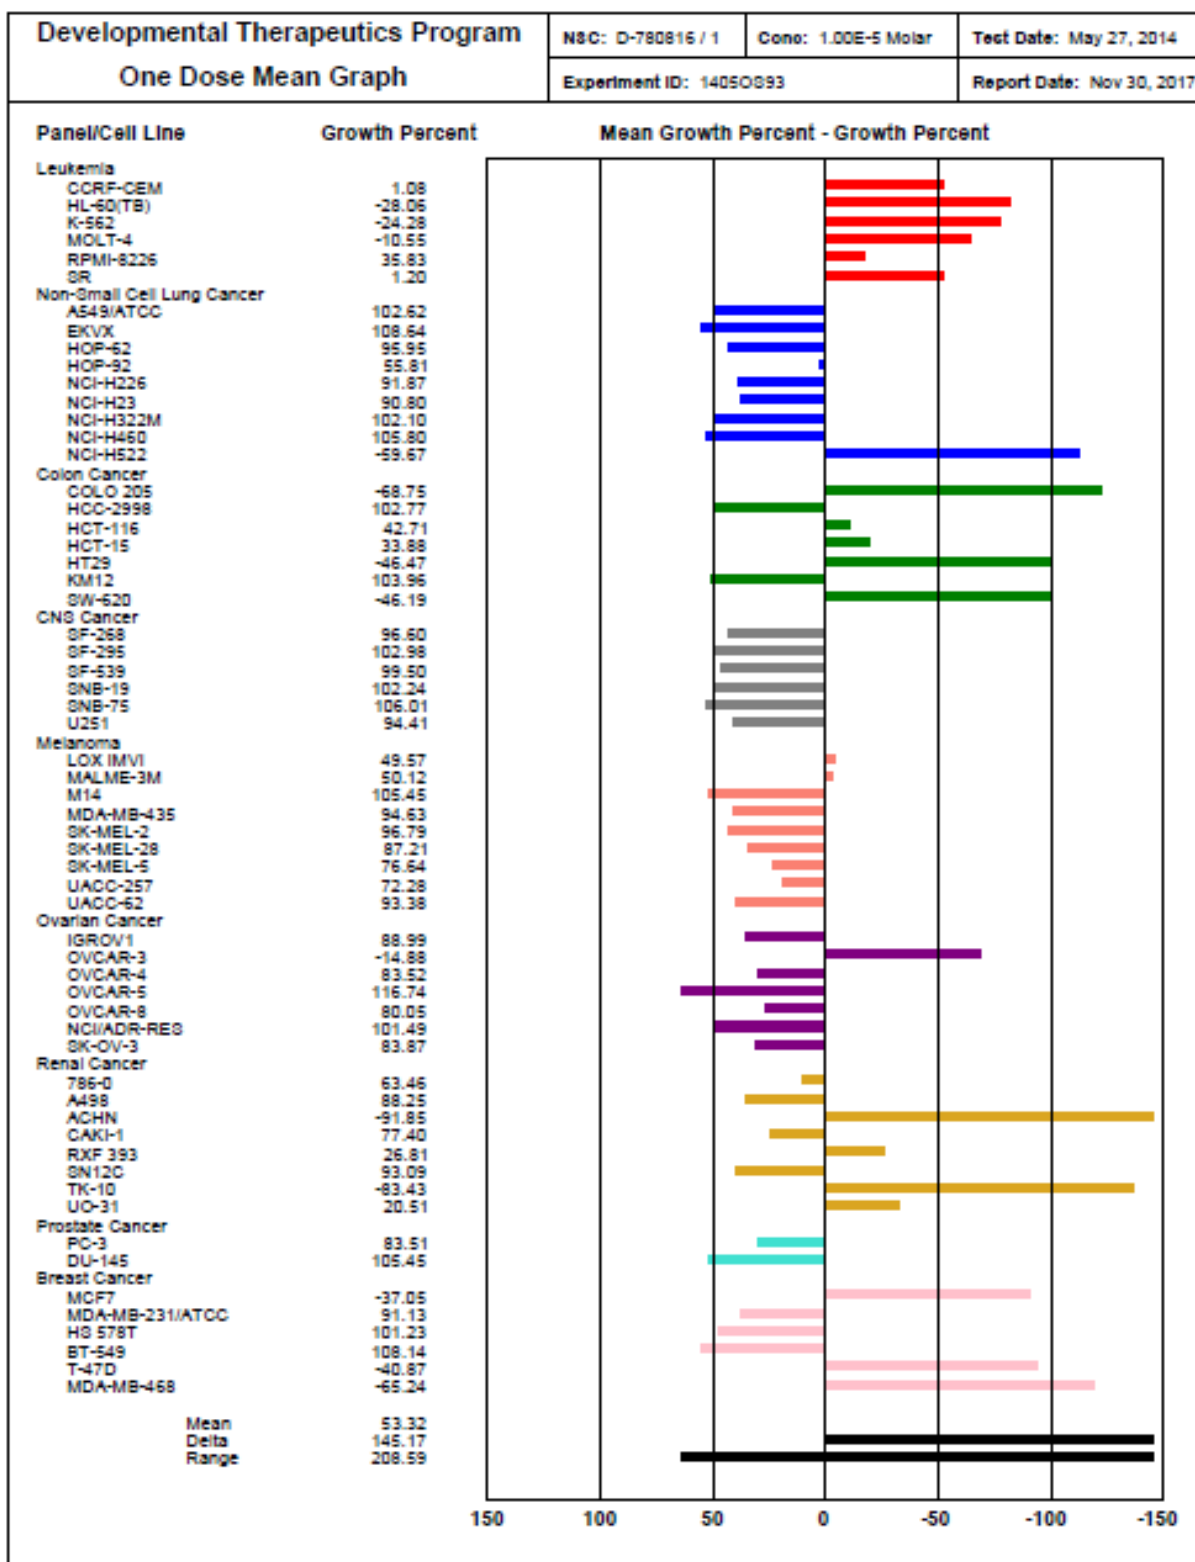

**Figure S5.** One dose mean graph data for 3-phenyl-1-(pyrid-2-yl)benzo[e][1,2,4]triazin-7(1H)-one (**4a**) towards the NCI-60 cell line panel.

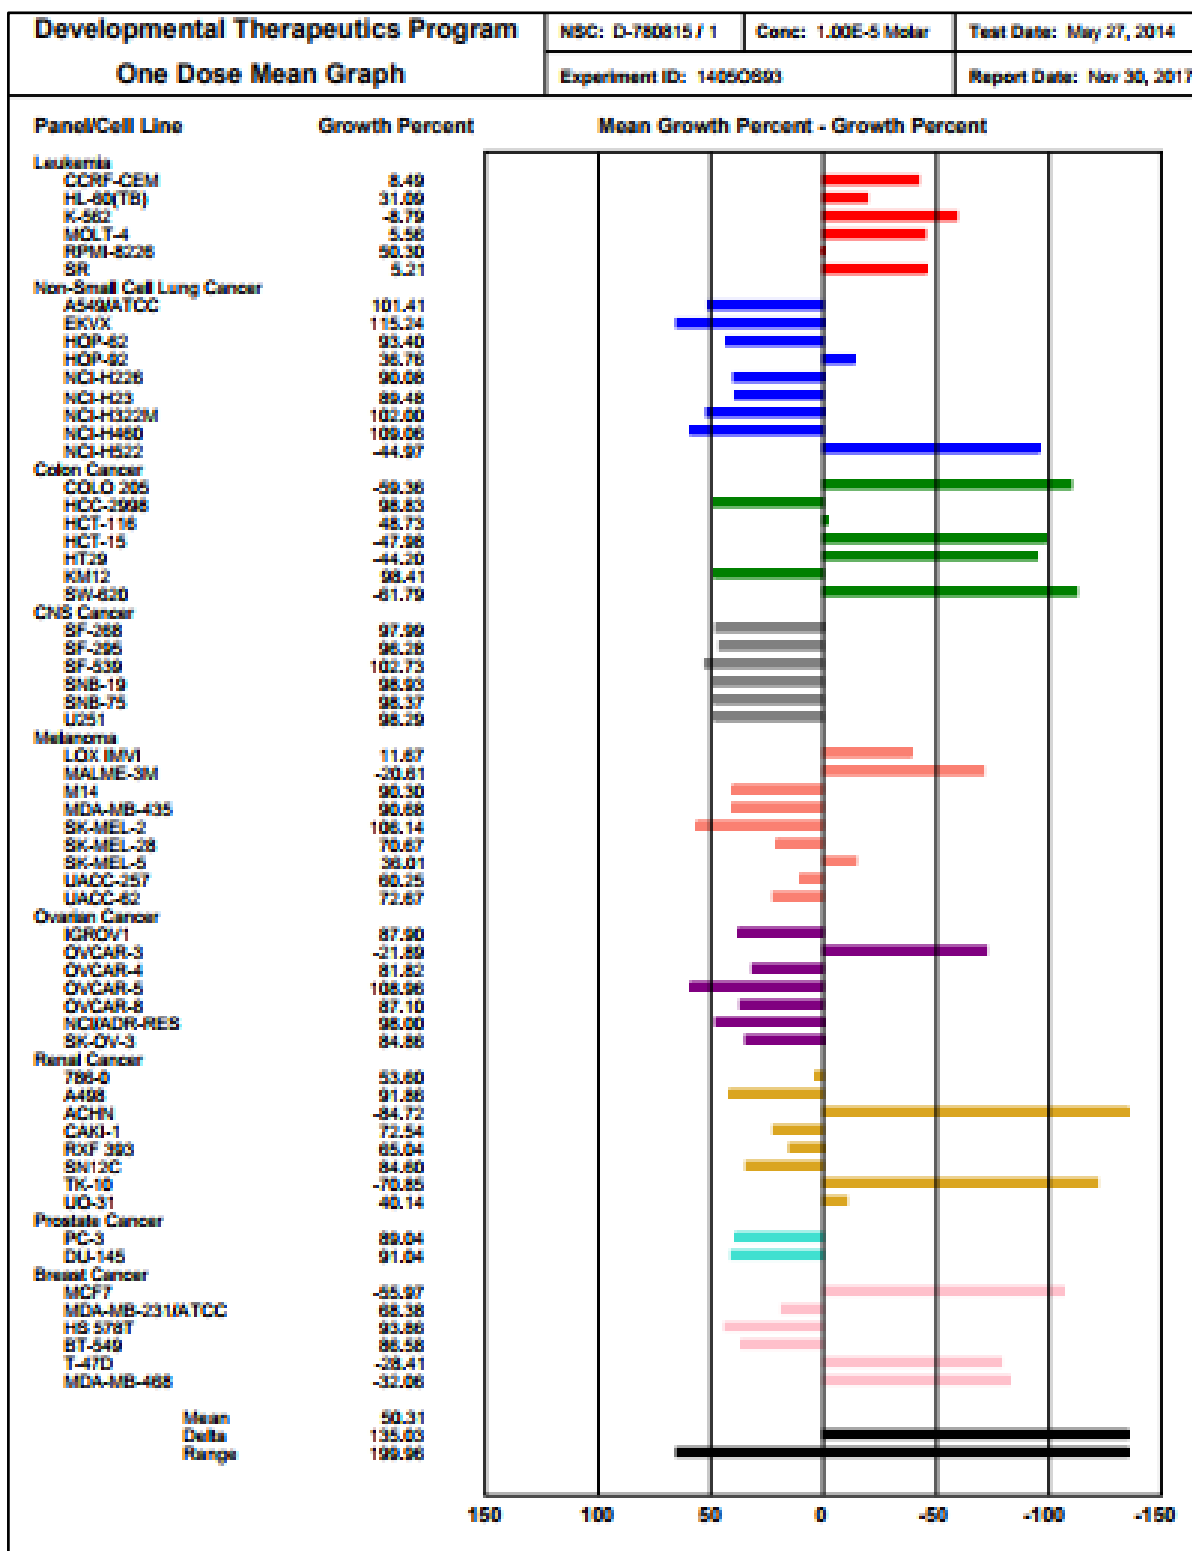

Figure S6. One dose mean graph data for 1-phenyl-3-(pyrid-2-yl)benzo[e][1,2,4]triazin-7(1H)-one (**4b**) towards the NCI-60 cell line panel.

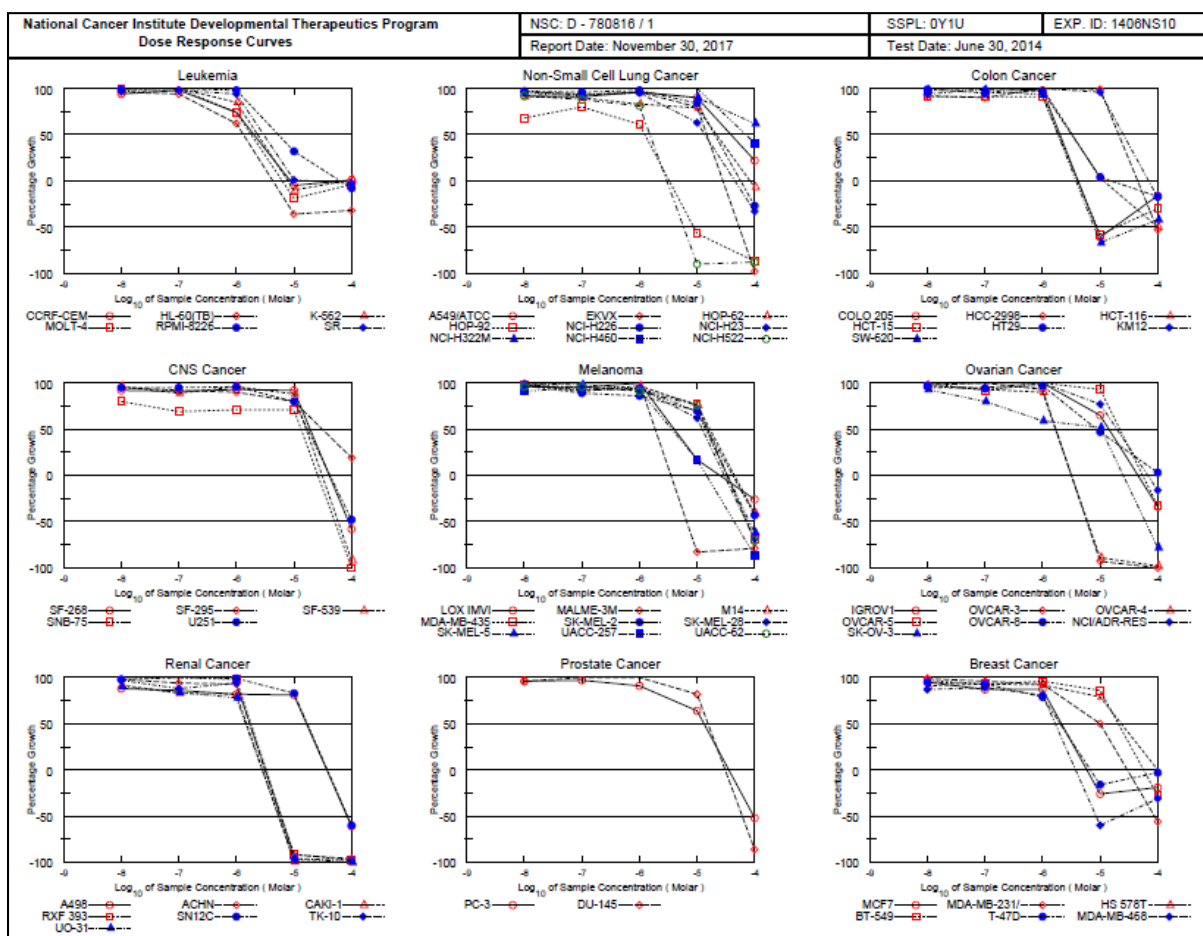

**Figure S7.** Five dose data for 3-phenyl-1-(pyrid-2-yl)benzo[e][1,2,4]triazin-7(1H)-one (4a) towards the NCI-60 cell line panel.



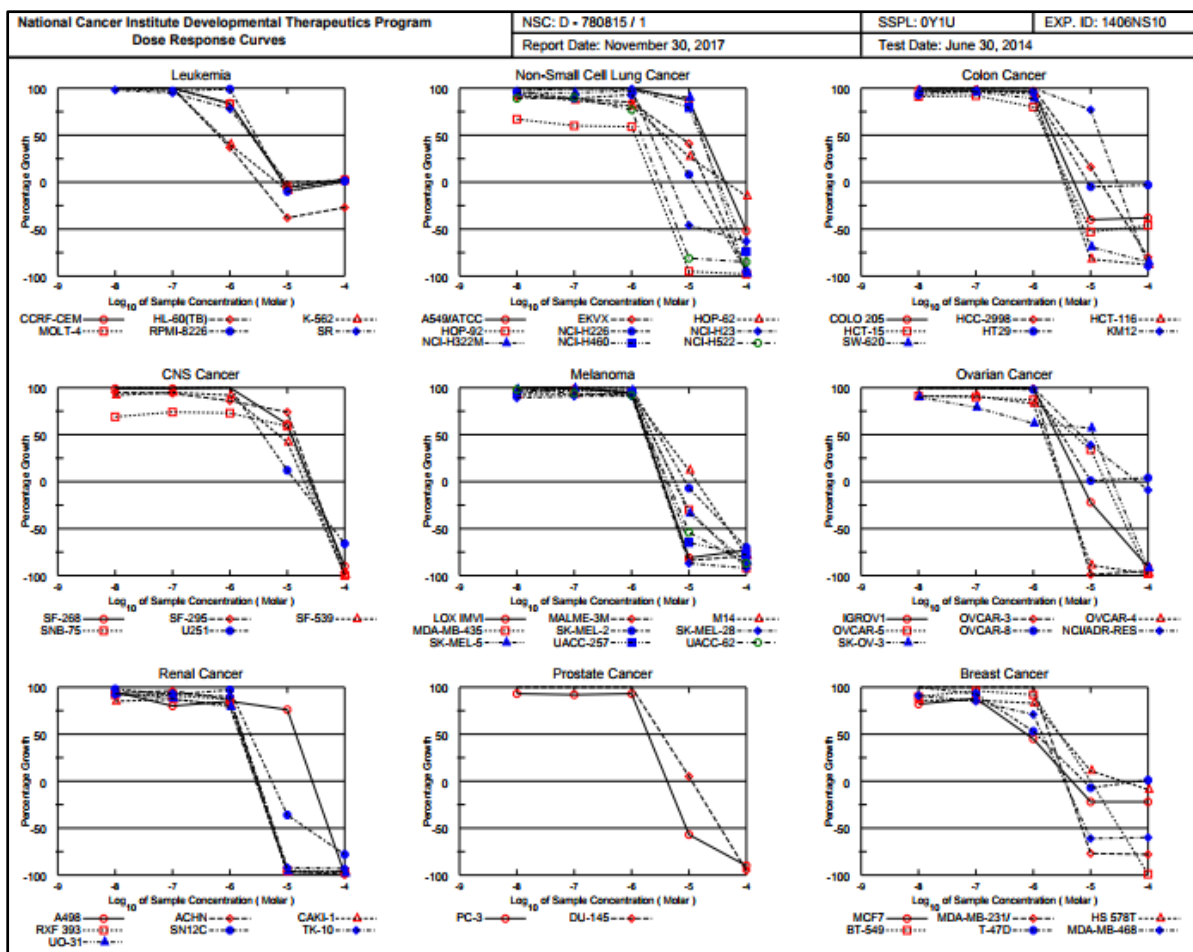

**Figure S8.** Five dose data for 1-phenyl-3-(pyridin-2-yl)benzo[e][1,2,4]triazin-7(1H)-one (4b) towards the NCI-60 cell line panel.

## Cell Viability Graphs

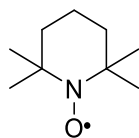

TEMPO

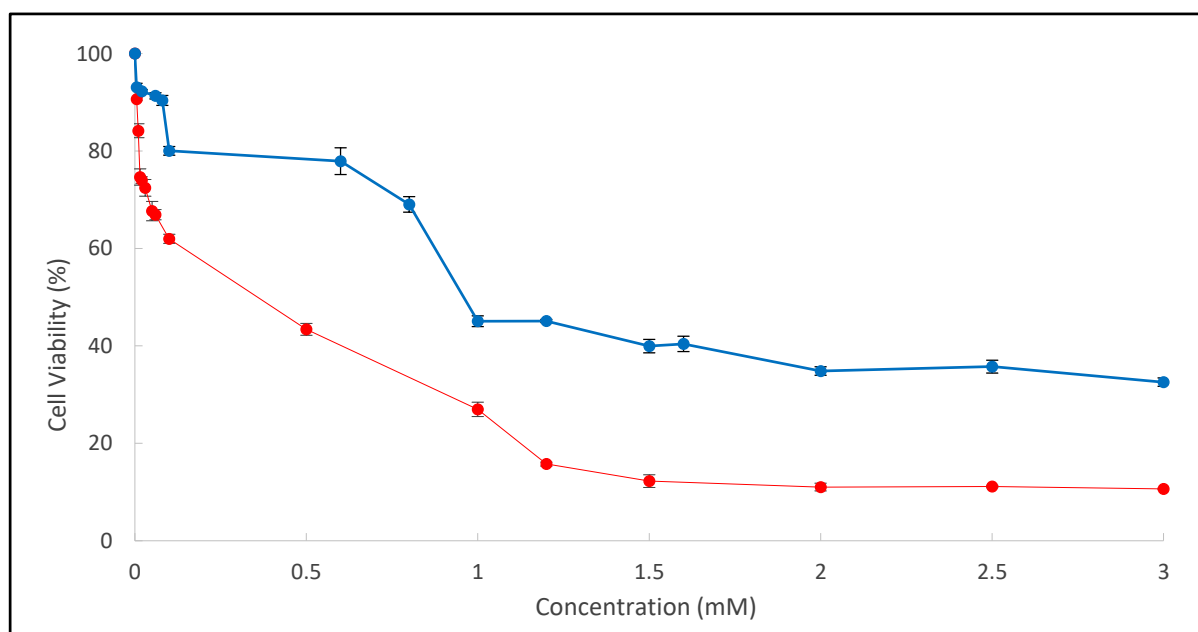

**Figure S9.** Viability of DU-145 (●) and MCF-7 (●) cell lines determined using MTT assay following treatment with TEMPO under aerobic conditions for 72 h at 37 °C. Each data point is the mean of at least two independent experiments. The lines shown are trend lines.

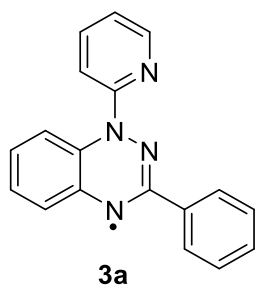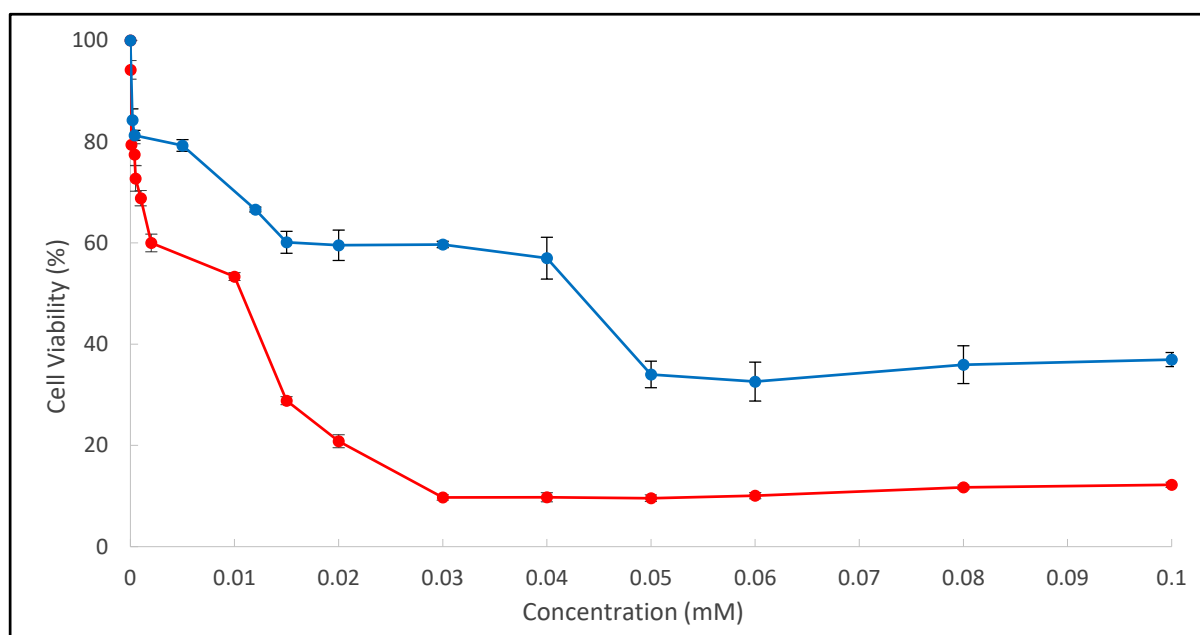

**Figure S10.** Viability of DU-145 (●) and MCF-7 (●) cell lines determined using MTT assay following treatment with 3-phenyl-1-(pyrid-2-yl)-1,4-dihydrobenzo[e][1,2,4]triazin-4-yl (**3a**) under aerobic conditions for 72 h at 37 °C. Each data point is the mean of at least two independent experiments. The lines shown are trend lines.

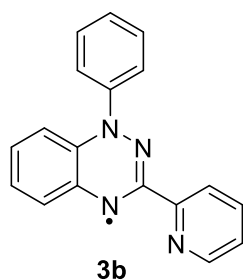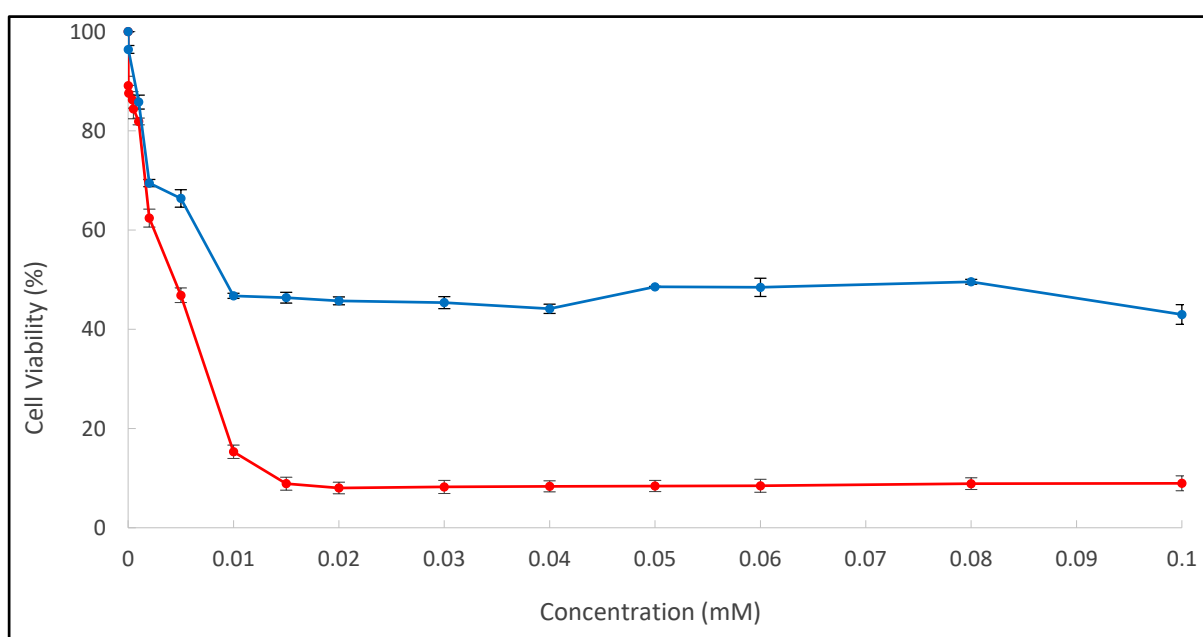

**Figure S11.** Viability of DU-145 (●) and MCF-7 (●) cell lines determined using MTT assay following treatment with 1-phenyl-3-(pyrid-2-yl)-1,4-dihydrobenzo[e][1,2,4]triazin-4-yl (**3b**) under aerobic conditions for 72 h at 37 °C. Each data point is the mean of at least two independent experiments. The lines shown are trend lines.

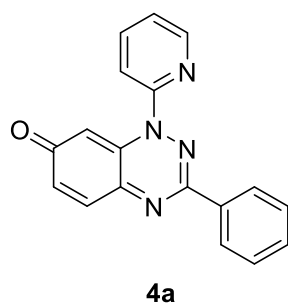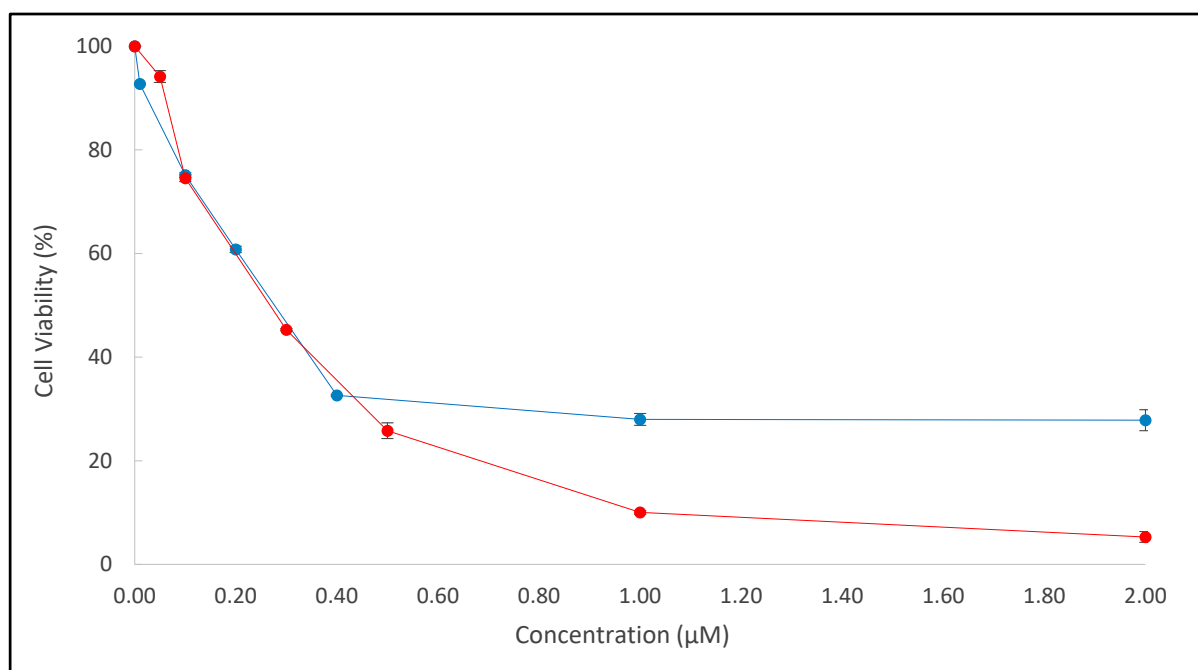

**Figure S12.** Viability of DU-145 (●) and MCF-7 (●) cell lines determined using MTT assay following treatment with for 3-phenyl-1-(pyrid-2-yl)benzo[*e*][1,2,4]triazin-7(1*H*)-one (**4a**) under aerobic conditions for 72 h at 37 °C. Each data point is the mean of at least two independent experiments. The lines shown are trend lines.

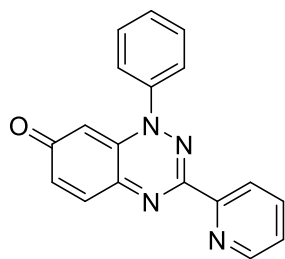

**4b**

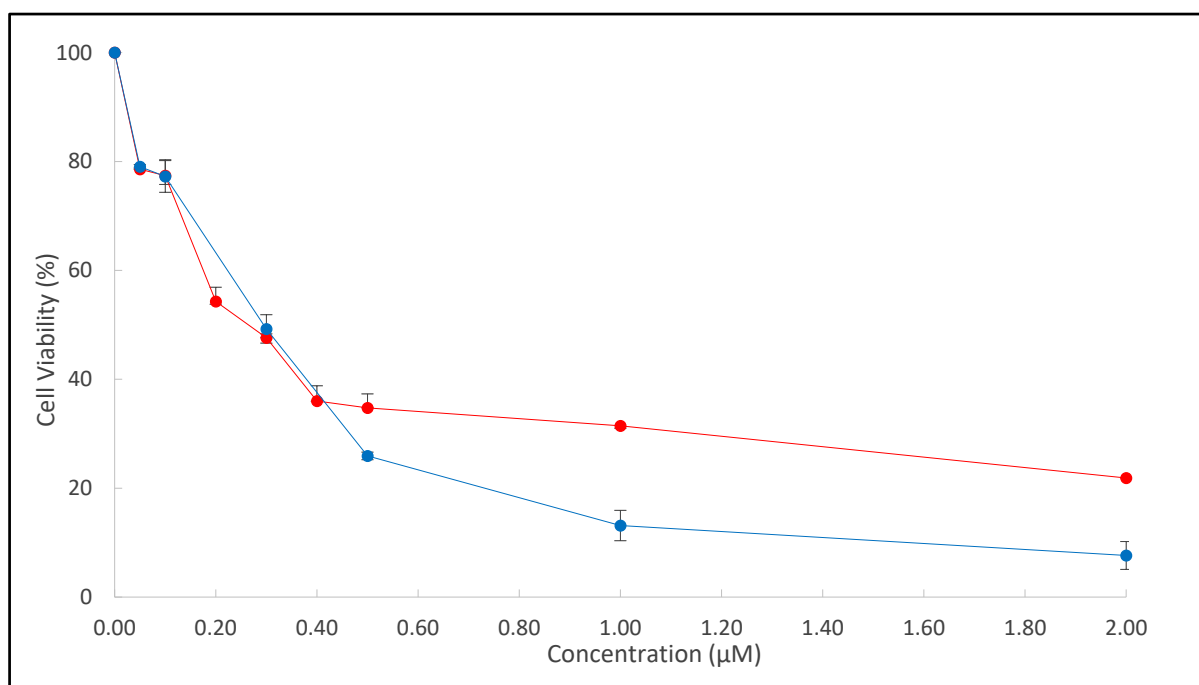

**Figure S13.** Viability of DU-145 (●) and MCF-7 (●) cell lines determined using MTT assay following treatment with 1-phenyl-3-(pyrid-2-yl)benzo[*e*][1,2,4]triazin-7(1*H*)-one (**4b**) under aerobic conditions for 72 h at 37 °C. Each data point is the mean of at least two independent experiments. The lines shown are trend lines.
